# Supplementary material for: Effectiveness and cost-effectiveness of a web-based routine assessment with integrated recommendations for action for depression and anxiety (RehaCAT+): protocol for a cluster randomised controlled trial for patients with elevated depressive symptoms in rehabilitation facilities
Source: HighWire-hosted journal article supplement (doi:10.1136/bmjopen-2022-061259), 2022-06-01
Supplement: bmjopen-2022-061259supp001_data_supplement.pdf [file bmjopen-2022-061259supp001_data_supplement.pdf]

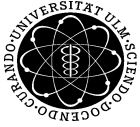

Faculty of Engineering, Computer  
Science and Psychology  
Institute of Psychology and Education  
Department of Clinical Psychology and  
Psychotherapy

**Prof. Dr. Harald Baumeister**

Lise-Meitner-Str. 16,  
89081 Ulm

Tel: +49 731 50-32814

Fax: +49 731 50-32809

[harald.baumeister@uni-ulm.de](mailto:harald.baumeister@uni-ulm.de)

## TEILNEHMENDEN-INFORMATION

Titel der Studie: RehaCAT+

Sehr geehrte Probandin, sehr geehrter Proband,

Herzlich willkommen zu unserer Studie RehaCAT+, wir danken Ihnen für Ihr Interesse!

Wir sind ein Studienteam der Abteilung für Klinische Psychologie und Psychotherapie des Instituts für Psychologie und Pädagogik an der Universität Ulm. Im Voraus möchten wir Sie darüber informieren, dass jede Teilnahme an einer wissenschaftlichen Studie freiwillig ist und wir aus diesem Grund für die Teilnahme ihre Einwilligung benötigen. Falls Sie nicht an der Studie teilnehmen möchten oder eine mögliche Teilnahme frühzeitig beenden möchten, entstehen Ihnen keine Nachteile. Mit diesem Schreiben möchten wir Sie umfassend zur Studie informieren und bitten Sie, den folgenden Text sorgfältig zu lesen. Sollten Sie im Nachhinein noch offene Fragen haben, können Sie uns telefonisch oder per Mail erreichen oder das Klinikpersonal fragen!

### WARUM WIRD DIESE STUDIE DURCHFÜHRT?

Die medizinische Rehabilitation sieht sich der Herausforderung gegenüber, medizinische Maßnahmen bedarfsgerecht einzuleiten und zu gestalten sowie die Nachhaltigkeit von Behandlungseffekten zu sichern. Nicht selten treten bei Menschen, die aufgrund von schwerwiegenden medizinischen Problemen eine Rehabilitation durchlaufen Symptome psychischer Belastungen auf. Eine umfassende psychosoziale Diagnostik erfordert viel Zeit und Ressourcen und ist aufgrund dessen in der Rehabilitationsroutine für die Klinik nur schwer umsetzbar und auch für Sie als Rehabilitand:in sehr zeitaufwändig.

Um Sie und ihre Rehabilitationseinrichtung bei einer umfangreichen und fundierten Diagnostik zu unterstützen, haben wir RehaCAT+ entwickelt. RehaCAT+ ist ein Computer- und Web-basiertes Testsystem, das adaptive Testverfahren verwendet. Das bedeutet, dass das System basierend auf den gegebenen Antworten die relevanten Fragen heraussucht, sodass nicht mehr jede einzelne Frage durchlaufen werden muss. Das ist insbesondere auch für Sie als Rehabilitand:in von Vorteil, da sich die Zeit zum Ausfüllen von Fragebögen stark verkürzt, bei gleichbleibend hoher Genauigkeit des Testergebnisses.

Basierend auf Ihren Testergebnissen erhält Ihr behandelnder Arzt oder Ihre behandelnde Ärztin in der Rehabilitationsklinik Rückmeldung über mögliche psychosoziale Belastungen. Diese Ergebnisse können Ihrem Arzt/Ihrer Ärztin dabei helfen, die bestmögliche Behandlung für Sie einzuleiten.

Ziel der Studie ist es, zu untersuchen, ob es 12 Monate nach Entlassung aus der Rehabilitation einen Unterschied im Wohlbefinden der Rehabilitand:innen im Vergleich zu anderen Kliniken gibt.

### ABLAUF DER STUDIE

Sie erhalten diese Informationen, da sie für eine Studienteilnahme in Frage kommen. Sofern Sie sich für eine Teilnahme entscheiden, bitten wir Sie der Einwilligungserklärung, welche im nächsten Teil folgen wird, zuzustimmen.

Im Rahmen der normalen Rehabilitationsmaßnahmen in Ihrer Klinik haben Sie bereits an der computer-adaptiven Befragung teilgenommen. Dies hilft dem Klinikpersonal, für Sie passende Behandlungsmaßnahmen einzuleiten. Im Zuge Ihrer Rehabilitation werden Sie bei Aufnahme, Entlassung sowie 6 Monate nach der Entlassung befragt, um festzustellen, wie es Ihnen geht und ob sich Ihre Symptome verbessert haben. Insgesamt durchlaufen Sie also routinemäßig 3 Befragungen.

Sollten Sie sich entscheiden an dieser Studie teilzunehmen, werden Ihnen zu jedem Befragungszeitpunkt noch einige zusätzliche Fragen gestellt, mit deren Beantwortung Sie einen wertvollen Beitrag zur Forschung leisten

und dabei helfen, künftige Behandlungen für Rehabilitand:innen wie Sie effektiver zu gestalten. Dabei werden sensible Daten zu Ihrer Gesundheit erfasst.

Basierend auf unseren Erfahrungen schätzen wir den zeitlichen Mehraufwand für Sie auf ca. 20 Minuten je Befragung. Zusätzlich befragen wir Sie 12 Monate nach der Rehabilitation, womit insgesamt vier Befragungen auf Sie zukommen.

#### **ENTGELT**

Das vollständige Ausfüllen der Onlinebefragungen wird mit einer finanziellen Aufwandsentschädigung vergütet. Für die Befragungen 6 und 12 Monate nach ihrem Rehabilitationsaufenthalt haben Sie die Möglichkeit jeweils 20 Euro elektronisch überwiesen zu bekommen.

#### **UMGANG MIT IHREN DATEN**

Im Rahmen der Studie werden Ihre Daten von der Abteilung Klinische Psychologie und Psychotherapie am Institut für Psychologie und Pädagogik Universität Ulm verwendet. Es haben nur diejenigen Personen innerhalb der Universität Zugriff auf Ihre pseudonymisierten Daten, die dies für einen ordnungsgemäßen Ablauf der Studie benötigen. Nach Abschluss der Studie wird die Kodierliste, welche Ihren Namen zu ihrer Reha-ID zuordnen und nur in ihrer Klinik vorliegt, gelöscht. Danach sind die Daten anonymisiert und es kann kein Personenbezug mehr hergestellt werden. Wissenschaftliche Veröffentlichungen erfolgen mit diesen anonymisierten Daten über viele Studienteilnehmende hinweg. Eine mögliche Weitergabe der anonymisierten Daten an Dritte beschränkt sich auf wissenschaftliche Nutzungszwecke. Zu keinem Zeitpunkt können Krankenversicherungen/ Leistungserbringer oder Arbeitgeber individualisierte Studiendaten einsehen. Nach der 6 und 12 Monatsbefragung möchten wir Ihnen jeweils eine Aufwandsentschädigung elektronisch überweisen.

Dazu werden wir nach Abschluss der Befragung Ihre IBAN, Name und Reha-ID erfassen. Ihre Bankdaten werden nicht mit den Gesundheitsdaten verknüpft und abgespeichert. Ihre Bankdaten Daten werden nach der elektronischen Überweisung der Vergütung unmittelbar gelöscht. Die Angabe Ihrer Bankdaten ist freiwillig. Sollten Sie keine Aufwandsentschädigung erhalten möchten, brauchen Sie Ihre Daten nicht angeben.

#### **GIBT ES RISIKEN DURCH DIE TEILNAHME AN DER STUDIE REHACAT+?**

Nebenwirkungen oder unerwünschte Wirkungen von Online Befragung oder ähnlicher Studien sind nicht bekannt. Manche der Aufgaben oder Fragen sind möglicherweise schwierig zu beantworten oder umzusetzen. Die Erfahrung, sich Ängsten oder unangenehmen Gedanken zu stellen, ist für die meisten Menschen zunächst nicht leicht, dann aber oft sehr hilfreich. Zusätzlich stehen Ihnen bei Bedarf zuständiges Klinikpersonal Als Ansprechpartner/in zur Verfügung und werden versuchen, Ihnen zu helfen.

#### **FREIWILLIGKEIT:**

An dieser Studie nehmen Sie freiwillig teil. Ihr Einverständnis können Sie jederzeit und ohne Angabe von Gründen widerrufen, dann werden alle bis dahin studienbedingt erhobenen personenbezogenen Daten gelöscht. Dieser eventuelle Widerruf hat keine Auswirkungen für Sie. Zur Löschung der Daten müssen Sie dem Forschungsteam Ihre Reha-ID mitteilen. Dafür können Sie sich jederzeit an die Supportmail Adresse (RehaCAT@uni-ulm.de) wenden, sowie während ihres Aufenthalts in der Klinik das Anliegen an Klinikmitarbeitende herantragen, welche wiederum die Reha-ID an das Forschungsteam weiterleiten. Es können nur alle Daten gelöscht werden. Das Löschen einzelner Fragebögen ist nicht möglich.

#### **ERREICHBARKEIT DER STUDIENMITARBEITER:**

Sollten während des Verlaufes der Studie Fragen auftauchen, so können Sie jederzeit folgende Ansprechpartner erreichen:

Yannik Terhorst  
Universität Ulm  
Institut für Psychologie und Pädagogik  
Abteilung für Klinische Psychologie und Psychotherapie  
Lise-Meitner-Straße 16, D-89081 Ulm  
Telefon: +49 731/50 32820  
E-Mail: yannik.terhorst@uni-ulm.de

Johannes Knauer  
Universität Ulm  
Institut für Psychologie und Pädagogik  
Abteilung für Klinische Psychologie und Psychotherapie  
Lise-Meitner-Straße 16, D-89081 Ulm

Telefon: +49 731/50 32805  
E-Mail: Johannes.knauer@uni-ulm.de

**VERSICHERUNG:**

Während der Teilnahme an der Studie genießen Sie Versicherungsschutz. Die an der Studie mitwirkenden Mitarbeitenden sind über die Universität Ulm beim Land Baden-Württemberg haftpflichtversichert für den Fall, dass Sie durch deren Verschulden einen Schaden erleiden.

Einen Schaden, der Ihrer Meinung nach auf diese Studie zurückzuführen ist, melden Sie bitte unverzüglich dem Studienleiter.

**SCHWEIGEPFLICHT/DATENSCHUTZ:**

Alle Personen, welche Sie im Rahmen dieser Studie betreuen, unterliegen der beruflichen Schweigepflicht und sind auf das Datengeheimnis verpflichtet. Die studienbezogenen Untersuchungsergebnisse sollen in anonymisierter Form in wissenschaftlichen Veröffentlichungen verwendet werden. Soweit es zur Kontrolle der korrekten Datenerhebung erforderlich ist, dürfen autorisierte Personen (z.B.: des Auftraggebers, der Universität) Einsicht in die studienrelevanten Teile der Akte nehmen. Sofern zur Einsichtnahme autorisierte Personen nicht der obengenannten beruflichen Schweigepflicht unterliegen, stellen personenbezogene Daten, von denen sie bei der Kontrolle Kenntnis erlangen, Betriebsgeheimnisse dar, die geheim zu halten sind.

Die in dieser Studie für die Datenverarbeitung verantwortliche Personen (Studienleiter selbst bzw. von ihm beauftragte Mitarbeitende; jedoch nicht Datenschutzbeauftragter) sind:

Yannik Terhorst  
Universität Ulm  
Institut für Psychologie und Pädagogik  
Abteilung für Klinische Psychologie und Psychotherapie  
Lise-Meitner-Straße 16, D-89081 Ulm  
Telefon: +49 731/50 32820  
E-Mail: yannik.terhorst@uni-ulm.de

Johannes Knauer  
Universität Ulm  
Institut für Psychologie und Pädagogik  
Abteilung für Klinische Psychologie und Psychotherapie  
Lise-Meitner-Straße 16, D-89081 Ulm  
Telefon: +49 731/50 32805  
E-Mail: Johannes.knauer@uni-ulm.de

Bei Fragen zur Nutzung oder Verarbeitung Ihrer Daten wenden Sie sich bitte an den/die:

- Datenschutzbeauftragte/n des lokalen Studienzentrums  
(a) *Universität Ulm: Universität Ulm, Helmholtzstr. 16, 89081 Ulm, Tel.Nr.: 07542 / 949 21 09,*  
E-Mail: [dsb@uni-ulm.de](mailto:dsb@uni-ulm.de)

Falls Sie Bedenken oder Beschwerden hinsichtlich der Verarbeitung Ihrer Daten haben, wenden Sie sich bitte an die Datenschutz-Aufsichtsbehörde Ihres Studienzentrums: Die entsprechenden Kontaktdaten finden Sie auf der Internetseite des Landesbeauftragten für Datenschutz und Informationsfreiheit Baden-Württemberg: <https://www.baden-wuerttemberg.datenschutz.de/dsb-online-melden/>

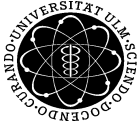

Faculty of Engineering, Computer  
Science and Psychology  
Institute of Psychology and Education  
Department of Clinical Psychology and  
Psychotherapy

**Prof. Dr. Harald Baumeister**

Lise-Meitner-Str. 16,  
89081 Ulm

Tel: +49 731 50-32814

Fax: +49 731 50-32809

[harald.baumeister@uni-ulm.de](mailto:harald.baumeister@uni-ulm.de)

## EINWILLIGUNGSERKLÄRUNG

Titel der Studie: RehaCAT+

Inhalt, Vorgehensweise, Risiken und Ziel der obengenannten Studie sowie die Befugnis zur Einsichtnahme in die erhobenen Daten wurden mir durch die online Informationsmaterialien ausreichend erklärt.

Falls Sie Fragen haben, können Sie sich an folgende Stellen wenden:

- Klinikmitarbeitende
- E-Mail: [RehaCAT@uni-ulm.de](mailto:RehaCAT@uni-ulm.de)
- Telefon: +49 731/50 32820 oder +49 731/50 32805

Ich hatte Gelegenheit Fragen zu stellen und alle eventuellen Fragen wurden geklärt.

Ja  Nein

Ich hatte ausreichend Zeit, mich für oder gegen die Teilnahme an der Studie zu entscheiden.

Ja  Nein

**E-Mail-Adresse:**

Zur Untersuchung des Langzeiteffekts dieser Studie würden wir sie gerne 6 und 12 Monate nach Abschluss ihrer Reha kontaktieren. Dies ist eine Voraussetzung für die Studienteilnahme. Ihre E-Mail-Adresse wird hierbei separat von allen anderen Daten gespeichert.

**Kontaktaufnahmen im Rahmen dieser Studie**

Ich gebe mein Einverständnis, dass ich im Rahmen der Studie unter der oben angegebenen E-Mail-Adresse kontaktiert werden darf.

JA  NEIN

**Elektronische Erfassung der Bankverbindung zur Aufwandsentschädigung**

Die Aufwandsentschädigung nach der 6 und 12 Monatsbefragung kann ausschließlich über eine elektronische Überweisung erfolgen. Dazu ist es notwendig, dass Sie im Anschluss an diese Befragungen Ihre Bankdaten angeben und der damit verbundenen Datenverarbeitung zustimmen. Wir klären Sie zu den Zeitpunkten jeweils erneut über die Verarbeitung auf. Die Angabe der Bankdaten ist zu beiden Zeitpunkten freiwillig.

Ich habe dies zur Kenntnis genommen.

JA  NEIN

Mir ist bewusst, dass die Einwilligungen freiwillig sind und ohne Nachteile (auch einzeln) verweigert oder jederzeit auch ohne Angaben von Gründen widerrufen werden können. Ich weiß, dass im Falle eines Widerrufs die Rechtmäßigkeit der aufgrund der Einwilligung bis zum Widerruf erfolgten Verarbeitung nicht berührt wird. Ich habe verstanden, dass ich mich für einen Widerruf einfach an die in den Informationen genannte Kontaktperson wenden kann und dass aus der Verweigerung der Einwilligung oder ihrem Widerruf keine Nachteile entstehen.

Mir wurden die Informationen zur Erhebung personenbezogener Daten in der Studie RehaCAT+ mitgeteilt

und zur Verfügung gestellt. Eine Kopie dieser Einwilligungserklärung können Sie jederzeit über den Menüpunkt „Informationen“ herunterladen oder vom Personal Ihrer Rehabilitationsklinik erhalten.

Ich habe die allgemeinen Informationen zur Studie „RehaCAT+“ gelesen und willige in die Teilnahme an der Studie und die damit verbundene Datenverarbeitung ein.

JA       NEIN

**[Weiter Button erscheint erst, nach aktiver Bestätigung dieses und der Bestätigung zur Datenverarbeitung – die Einwilligung ist rein digital]**
